# Supplementary material for: A human fetal liver-derived infant MLL-AF4 acute lymphoblastic leukemia model reveals a distinct fetal gene expression program
Source: PubMed Central journal article supplement (PMC8616957; doi:10.1038/s41467-021-27270-z), 2021-11-25
Supplement: 41467_2021_27270_MOESM1_ESM.pdf [file 41467_2021_27270_MOESM1_ESM.pdf]

# **A human fetal liver-derived infant *MLL-AF4* Acute Lymphoblastic Leukemia model reveals a distinct fetal gene expression program**

## **Supplementary Information**

Siobhan Rice<sup>1</sup>, Thomas Jackson<sup>2</sup>, Nicholas T Crump<sup>1</sup>, Nicholas Fordham<sup>1</sup>, Natalina Elliott<sup>2</sup>, SORCHA O'BYRNE<sup>2</sup>, Maria del Mar Lara Fanego<sup>3</sup>, Dilys Addy<sup>3</sup>, Trisevgeni Crabb<sup>3</sup>, Carryl Dryden<sup>3</sup>, Sarah Inglott<sup>3</sup>, Dariusz Ladon<sup>3</sup>, Gary Wright<sup>3</sup>, Jack Bartram<sup>3</sup>, Philip Ancliff<sup>3</sup>, Adam J Mead<sup>1</sup>, Christina Halsey<sup>4,5</sup>, Irene Roberts<sup>1,2</sup>, Thomas A Milne<sup>\*1</sup>, Anindita Roy<sup>\*1,2</sup>

**a**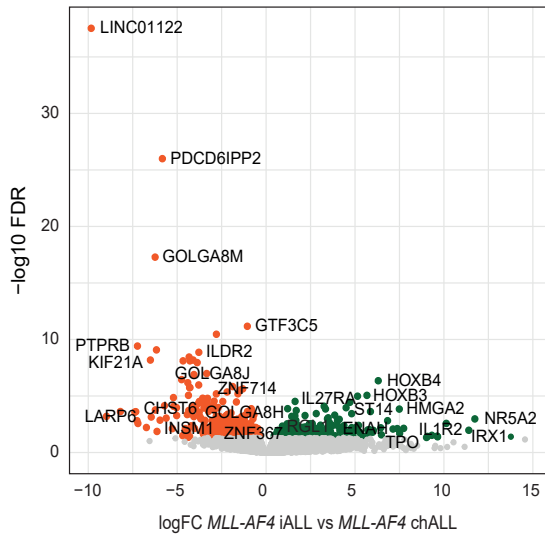**b**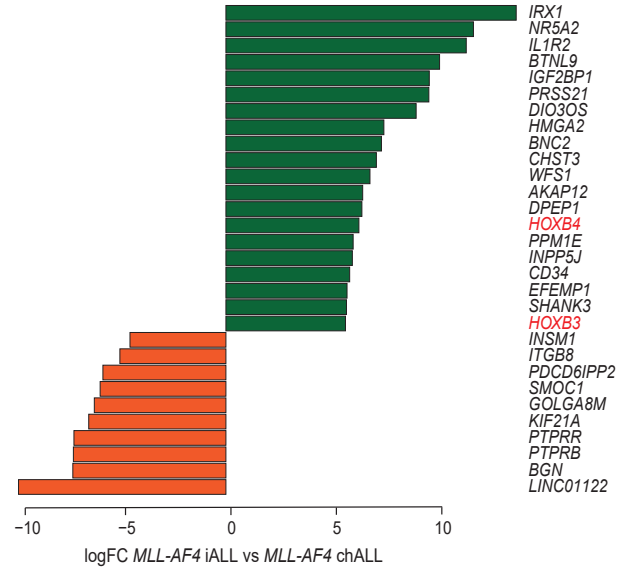**c**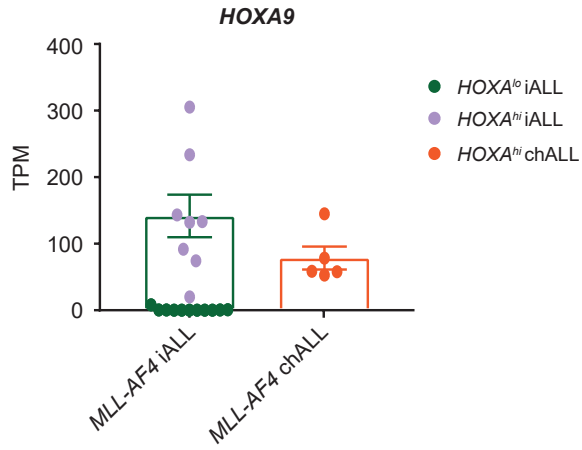

## Supplementary Figure 1

- a. Volcano plot showing all differentially expressed genes between *MLL-AF4* infant-ALL and *MLL-AF4* childhood ALL (dark green = significantly upregulated in *MLL-AF4* infant-ALL (FDR<0.05, edgeR exact test); orange = significantly upregulated in *MLL-AF4* childhood-ALL (FDR<0.05, edgeR exact test), gray = not significantly differentially expressed (FDR>0.05, edgeR exact test)). A selection of the most differentially expressed genes are labelled.
- b. Barplot showing the genes with the greatest logFC in *MLL-AF4* infant-ALL (green; top 20) and *MLL-AF4* childhood-ALL (orange; top 10).
- c. Barplot showing expression of *HOXA9* in *MLL-AF4* infant-ALL (iALL, n=19) and *MLL-AF4* childhood-ALL (chALL, n=5) from a previously published patient dataset<sup>1</sup>. Values are shown as transcripts per million (TPM). Data shown as mean  $\pm$  SEM. Patients were considered to have a *HOXA*<sup>lo</sup> molecular profile when they showed a *HOXA9* expression < 15 TPM. (dark green = *HOXA*<sup>lo</sup> *MLL-AF4* infant-ALL (iALL), n=11; purple = *HOXA*<sup>hi</sup> *MLL-AF4* infant-ALL (iALL), n=8; orange = *HOXA*<sup>hi</sup> *MLL-AF4* childhood-ALL (chALL)) (ns; p>0.5)

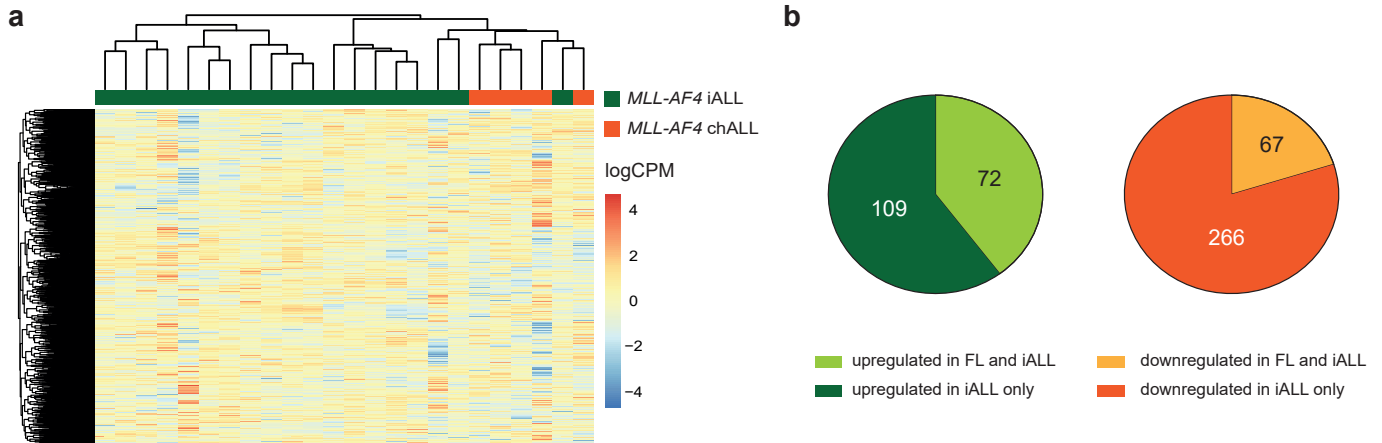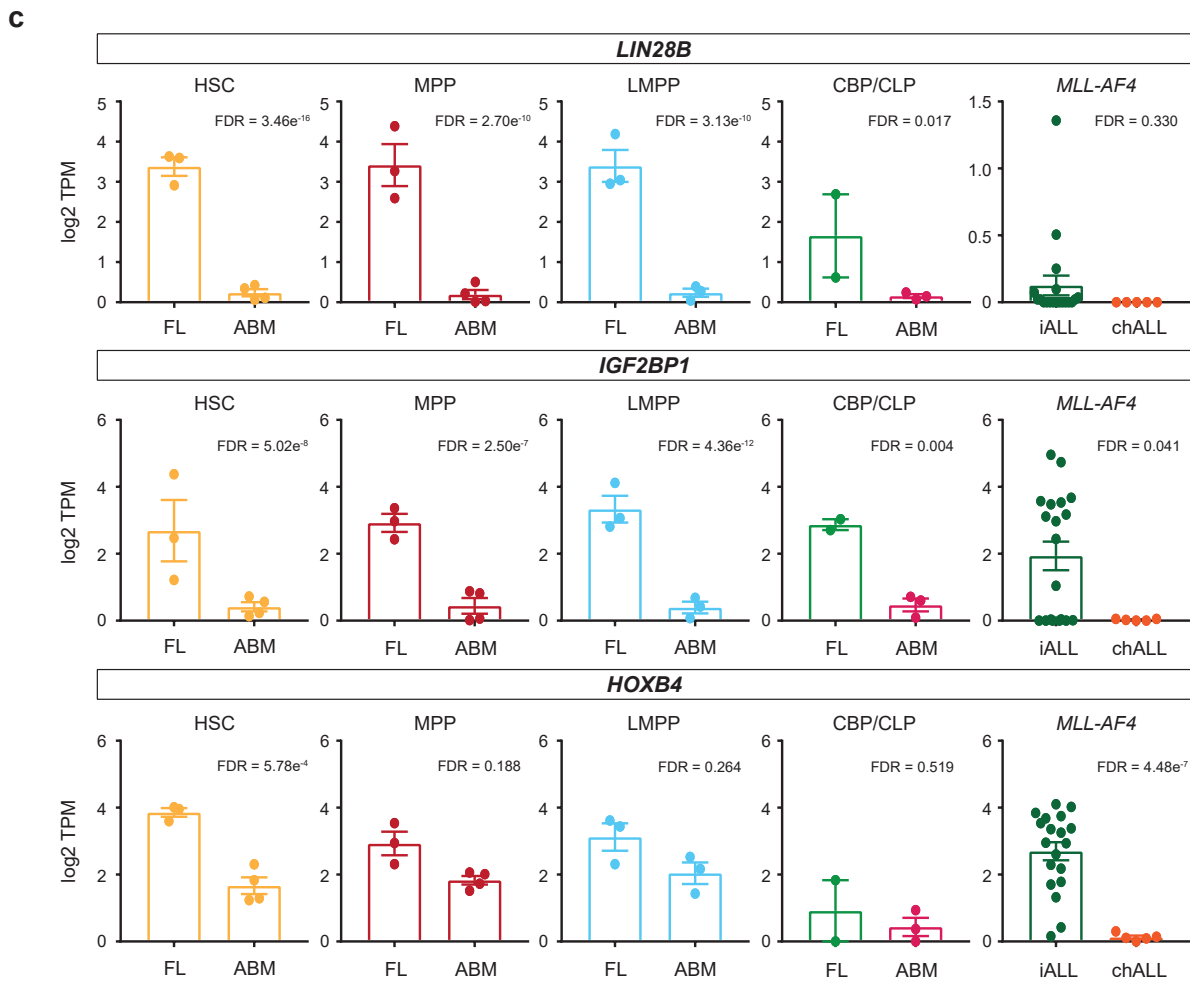

## Supplementary Figure 2

- a. Heatmap showing clustering of *MLL-AF4* infant-ALL (iALL (green), n=19) and *MLL-AF4* childhood-ALL (chALL (orange), n=5) based on 5,709 significantly differentially expressed genes between FL and ABM HSPCs (FDR<0.05, edgeR exact test, Supplementary Table 2). Color scale = log<sub>2</sub> counts per million (logCPM).
- b. Pie charts showing proportion of genes upregulated in *MLL-AF4* infant-ALL (compared to *MLL-AF4* childhood ALL; dark green) that are also upregulated in FL (compared to ABM; light green), and the proportion of genes downregulated in *MLL-AF4* infant-ALL (compared to *MLL-AF4* childhood ALL; orange) that are also downregulated in FL (compared to ABM; yellow) (see Supplementary Table 2). Values shown as number of genes.
- c. Barplot showing expression of *LIN28B*, *IGF2BP1* and *HOXB4* in FL and ABM HSPC subpopulations (HSC = hematopoietic stem cell (n=3 FL, n=4 ABM), MPP = multipotent progenitor cell (n=3 FL, n=4 ABM), LMPP = lymphoid-primed multipotent progenitor cell (n=3 FL, n=4 ABM), CBP = committed B progenitor (n=2 FL), CLP = common lymphoid progenitor (n=4 ABM)), as well as *MLL-AF4* infant-ALL (iALL; n=19) and *MLL-AF4* childhood ALL (chALL; n=5). Data shown as mean ± SEM.

**a**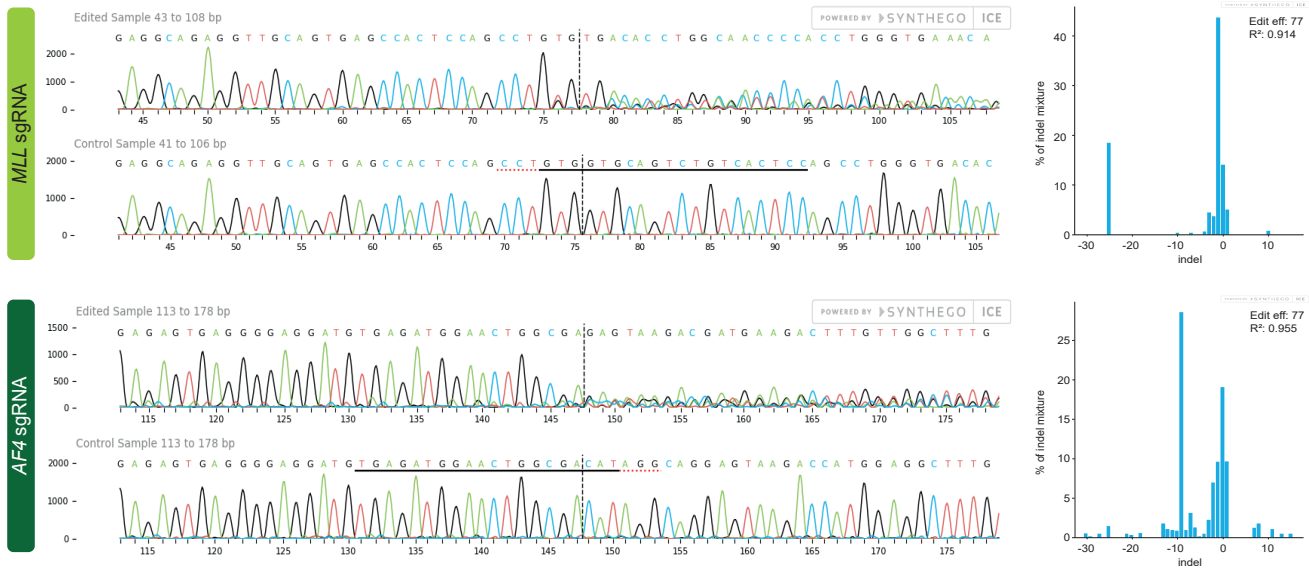**b**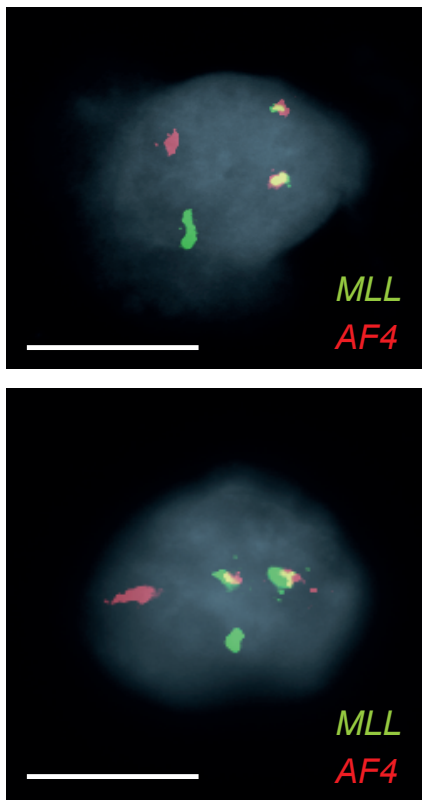**c**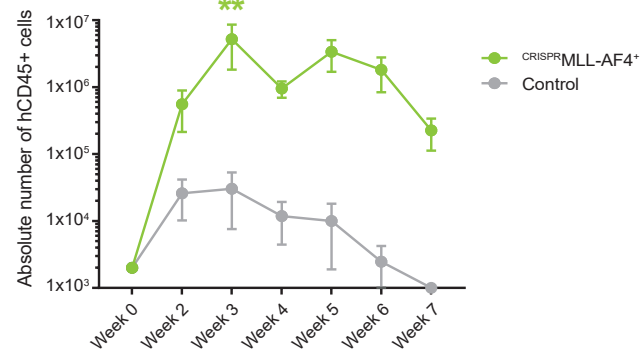**d**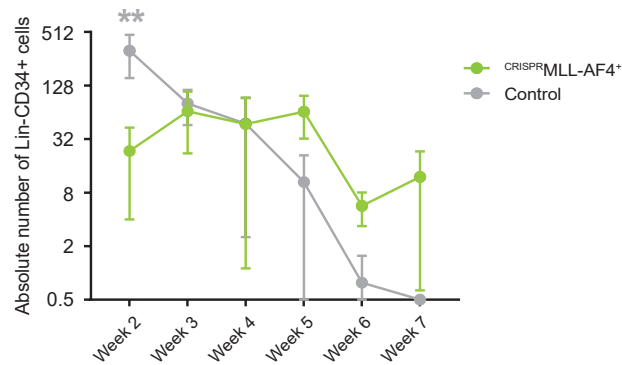

### Supplementary Figure 3

- a.** Synthego ICE Analysis (<https://ice.synthego.com/>) results for individual sgRNA efficiency tests for *MLL*-sgRNA and *AF4*-sgRNA in FL CD34+ cells. (left) Sanger sequencing tracks for edited cells (top) and unedited controls (bottom) around the PAM site. (right) Quantification of indels in edited cells. *MLL*-sgRNA and *AF4*-sgRNA both showed an editing efficiency of 77%.
- b.** Representative *MLL-AF4* FISH images for 2 biological replicates of <sup>CRISPR</sup>*MLL-AF4*+ cells *in vitro* (donors 4 (top) and 5 (bottom)). Cells taken at week 4. Scale bar = 10µm.
- c.** Cumulative absolute number of human CD45+ cells per well over time during MS-5 co-culture assay of <sup>CRISPR</sup>*MLL-AF4*+ and control cells (n=3; donor 1-3). \*\* p=0.0015 (Two-way ANOVA with Sidak correction for multiple comparisons). Data shown as mean ± SEM.
- d.** Cumulative absolute number of human Lin-CD34+ cells per well over time during MS-5 co-culture assay of <sup>CRISPR</sup>*MLL-AF4*+ and control cells (n=3; donor 1-3). \*\* p=0.0046 (Two-way ANOVA with Sidak correction for multiple comparisons). Data shown as mean ± SEM.

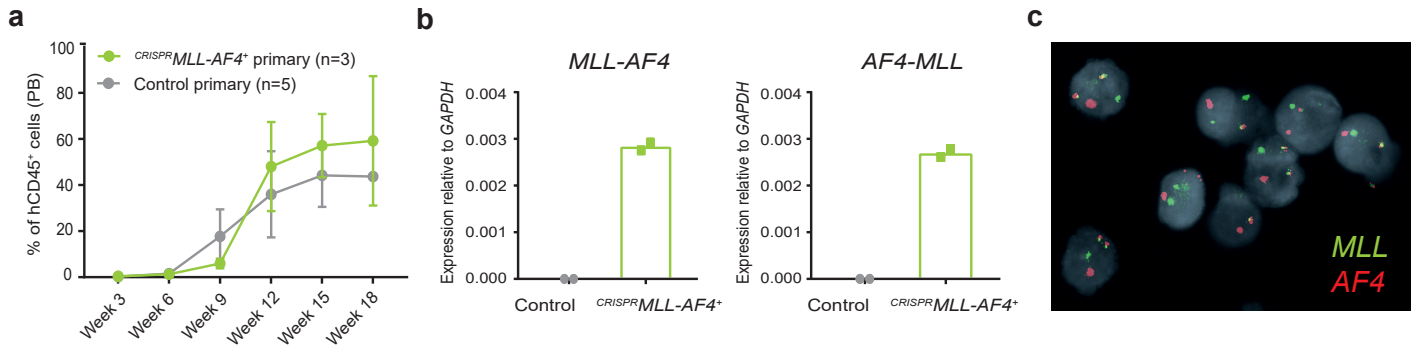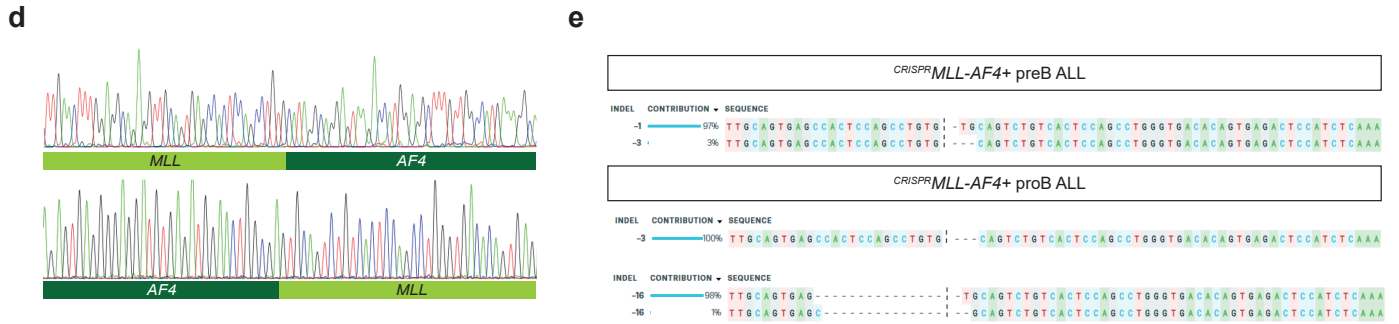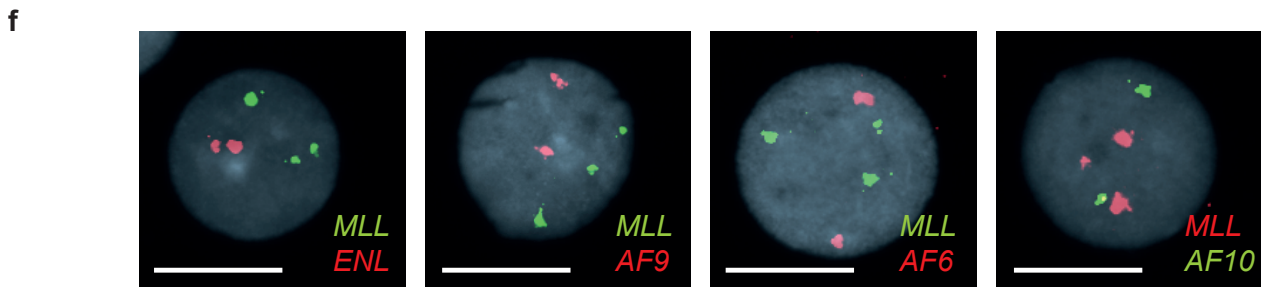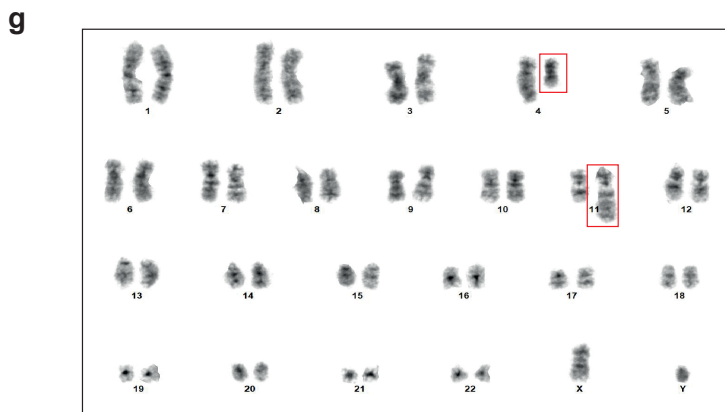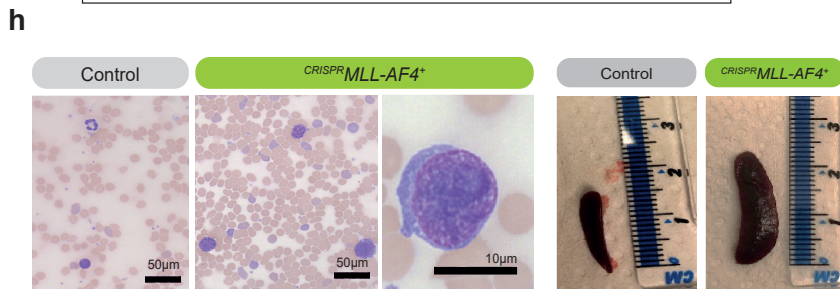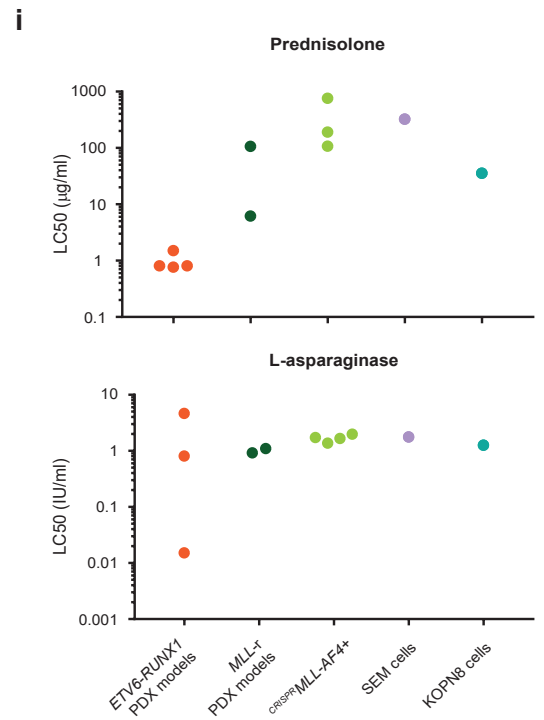



#### Supplementary Figure 4

- a. PB engraftment of human CD45+ (hCD45+) cells over time in primary <sup>CRISPR</sup>*MLL-AF4*+ (n=3) and control (n=5) recipient mice. Quantified as a percentage of all CD45+ cells (mouse CD45.1+ and human CD45+). Data shown as mean ± SEM (Two-way ANOVA with Sidak correction for multiple comparisons. ns; p>0.5).
- b. RT-qPCR showing expression of *MLL-AF4* (n=2) and *AF4-MLL* (n=2) relative to *GAPDH* in human CD45+ cells isolated from PB at week 12 post-engraftment.
- c. Representative *MLL-AF4* FISH image showing multiple nuclei for <sup>CRISPR</sup>*MLL-AF4*+ ALL spleen (n=3; donors 1-2).
- d. Sanger sequencing tracks showing *MLL-AF4* and *AF4-MLL* genomic DNA breakpoints in blasts isolated from the spleen of <sup>CRISPR</sup>*MLL-AF4*+ mice. Breakpoint regions were amplified by PCR before Sanger sequencing in order to examine the translocated allele without contamination by the remaining WT allele. *MLL* and *AF4* portions are labelled below each track.
- e. Sanger sequencing data showing indels present in each <sup>CRISPR</sup>*MLL-AF4*+ ALL (n=3) compared to original unedited FL cells (donors 1 and 2). Contribution = percentage of cells with each indel. Deletions are shown as horizontal dashed lines in the sequence. The CRISPR-Cas9 cut sites is shown as a vertical dashed line in the sequence.
- f. Representative FISH for the top 4 other *MLL* translocations (*MLL-ENL*, *MLL-AF9*, *MLL-AF6* and *MLL-AF10*) in the <sup>CRISPR</sup>*MLL-AF4*+ ALL spleen (n=3; donors 1-2). 3 signals can be detected for *MLL* in each case due to the presence of the *MLL-AF4*/t(4;11) translocation. Scale bar = 10µm.
- g. Representative karyotype data for <sup>CRISPR</sup>*MLL-AF4*+ ALL (n=1; preB ALL).
- h. (left) Representative H&E-stained peripheral blood (PB) films for control (left) and <sup>CRISPR</sup>*MLL-AF4*+ (right) primary recipient mice (n=5; donors 1, 2, 3 and 6). Low magnification images (scale bar = 50µm) show multi-lineage cells in the PB in controls

and predominantly circulating blast cells in *CRISPR**MLL-AF4*<sup>+</sup> mice. High magnification image (scale bar = 10µm) shows a representative blast cell from *CRISPR**MLL-AF4*<sup>+</sup> PB. (right) Representative images of the spleens of control and *CRISPR**MLL-AF4*<sup>+</sup> mice.

- i. Resistance (represented by LC50) to prednisolone (µg/ml) and L-asparaginase (IU/ml) for *ETV6-RUNX1* patient-derived xenograft (PDX) models, *MLL-r* PDX models, *CRISPR**MLL-AF4*<sup>+</sup> ALL (preB secondary recipients and proB primary and secondary recipients) and the SEM and KOPN8 cell lines. Each point represents a biological replicate.

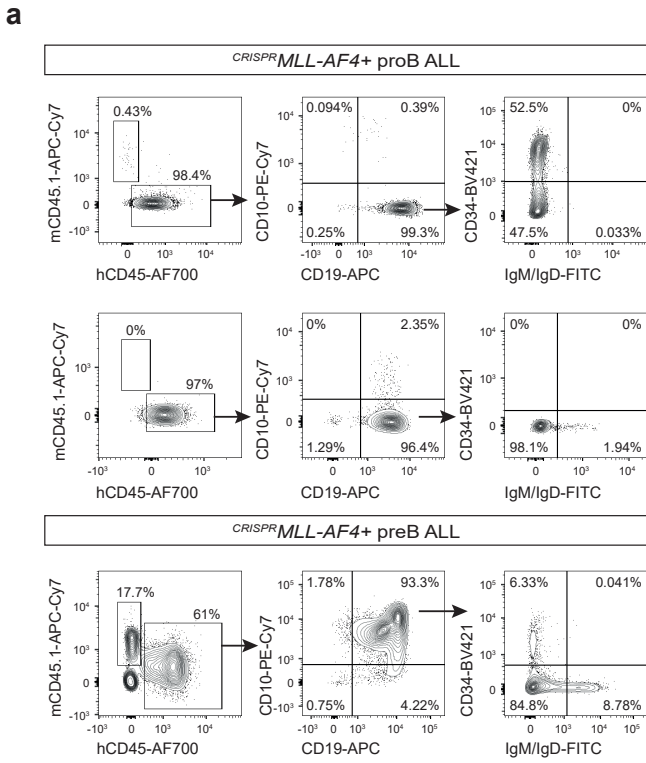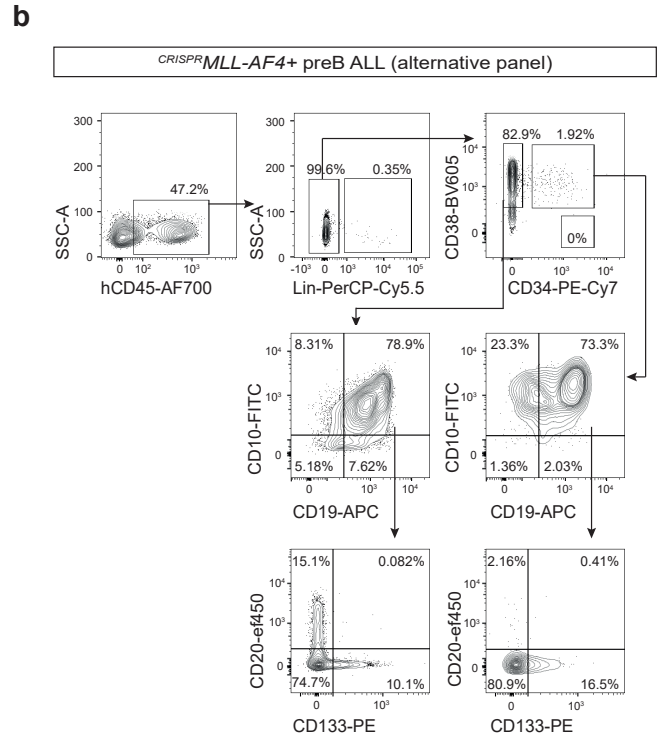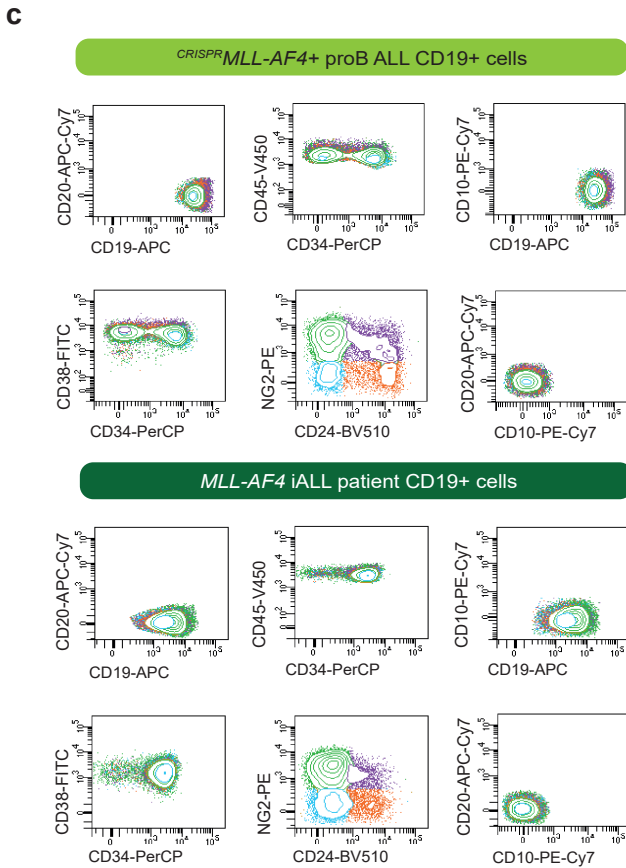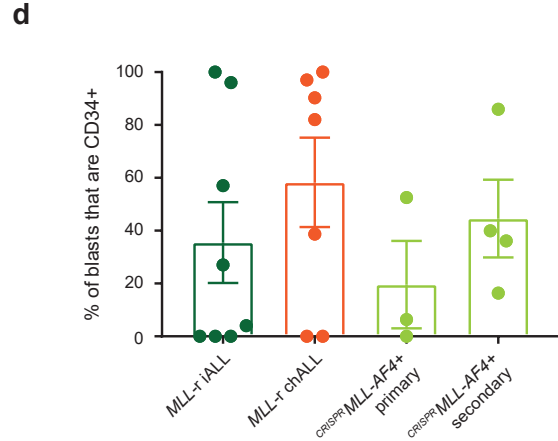

### Supplementary Figure 5

- a. Representative flow cytometry plots of viable, single cells in proB<sup>CRISPR</sup>*MLL-AF4*+ (top) and preB<sup>CRISPR</sup>*MLL-AF4*+ (bottom) BM at termination. (mCD45.1 = mouse CD45; hCD45 = human CD45).
- b. Representative extended flow cytometry plots of viable, single cells in preB<sup>CRISPR</sup>*MLL-AF4*+ BM at termination.
- c. Representative flow cytometry plots of CD19+ blasts from *CRISPR**MLL-AF4*+ BM at termination (week 18) (top) and an *MLL-AF4* infant-ALL patient BM (bottom). Datapoints are colored in all plots based on surface NG2 and CD24 expression.
- d. Barplot showing the proportion of CD19+ B-ALL blasts that are CD34+ for primary *MLL-r* infant-ALL (dark green, n=8) and *MLL-r* childhood-ALL (orange, n=7) patient samples, and primary (n=3) and secondary (n=4) *CRISPR**MLL-AF4*+ ALL (light green). Data shown as mean ± SEM (One-way ANOVA with Tukey correction for multiple comparisons. ns; p>0.5).

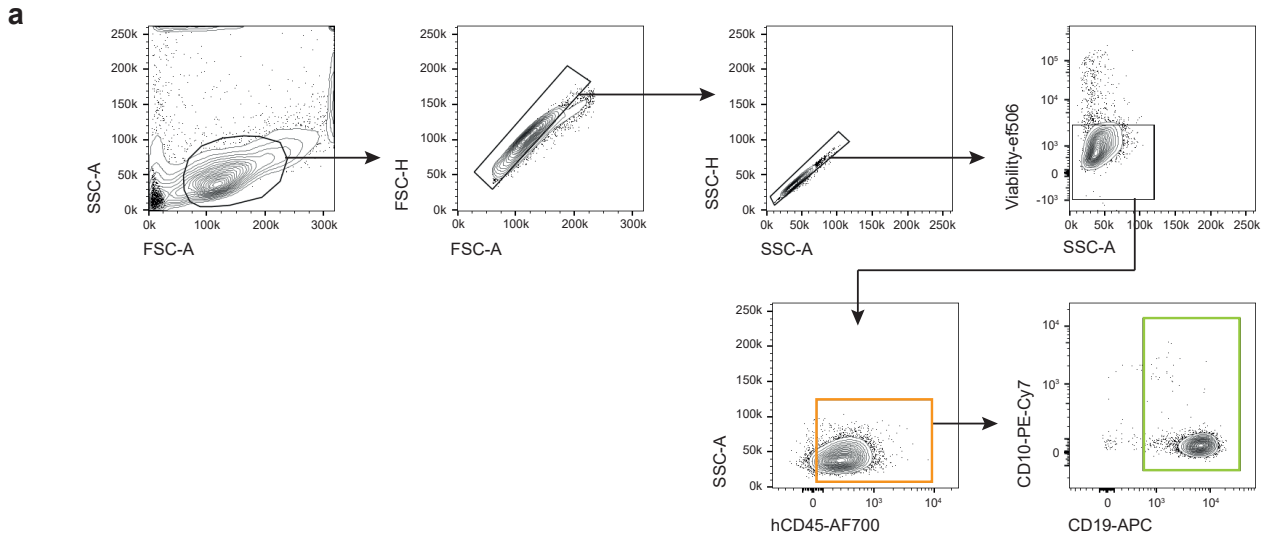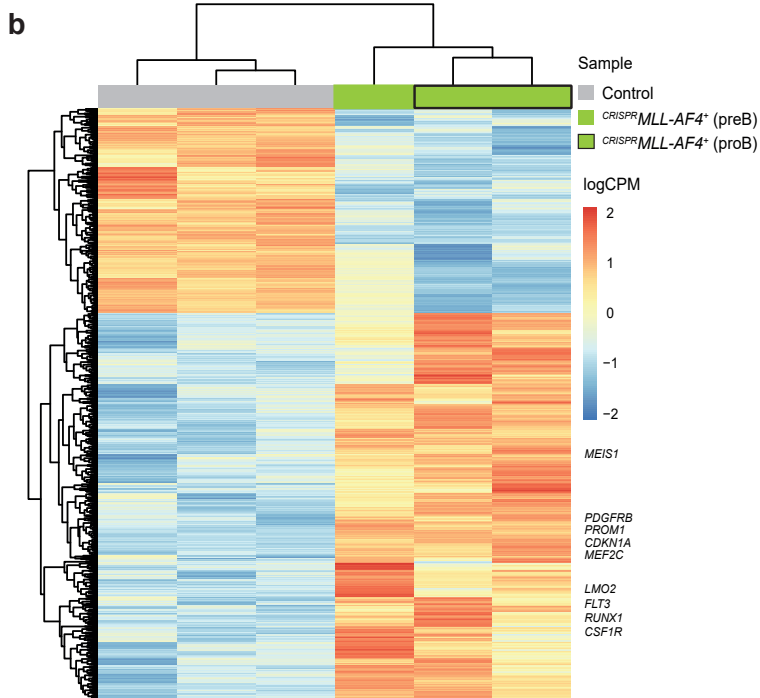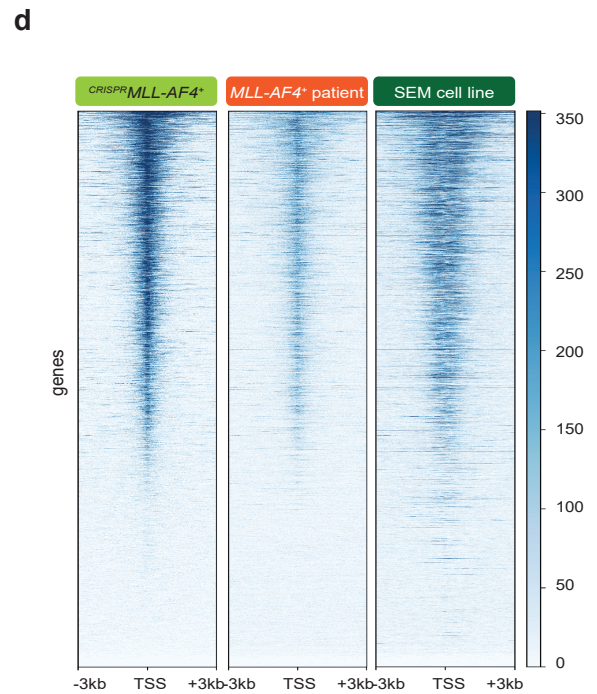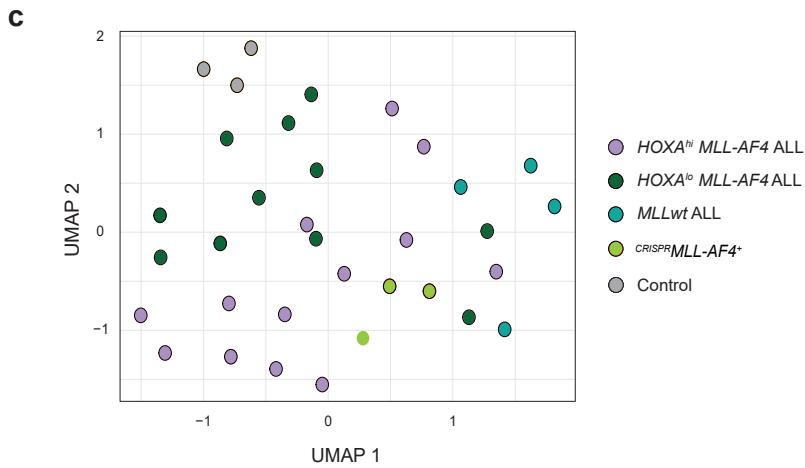

## Supplementary Figure 6

- a. Representative sort strategy to sort CD19<sup>+</sup> cells from *CRISPR**MLL-AF4*<sup>+</sup> and control primary mouse BM for qPCR analysis (orange; hCD45<sup>+</sup>) and RNA-seq analysis (light green; hCD45<sup>+</sup>CD19<sup>+</sup>) (n=3 *CRISPR**MLL-AF4*<sup>+</sup> and n=3 control, donors 1-2).
- b. Heatmap showing significantly differentially expressed genes (1,068 genes, FDR < 0.05) between primary control (grey) and *CRISPR**MLL-AF4*<sup>+</sup> (light green; black border = proB, no border = preB) mice. A selection of genes known to be upregulated in *MLL-AF4* ALL are labelled.
- c. UMAP showing clustering of *CRISPR**MLL-AF4*<sup>+</sup> (light green; black border = proB, no border = preB) and control (gray) mice with *HOXA*<sup>lo</sup> *MLL-AF4* ALL (iALL; dark green), *HOXA*<sup>hi</sup> *MLL-AF4* ALL (iALL; purple) and *MLL*wt (blue) ALL patients from a publicly available dataset<sup>20</sup> based on 5,785 significantly differentially expressed genes between *CRISPR**MLL-AF4*<sup>+</sup> ALL, control, *MLL-AF4* ALL and *MLL*wt ALL (FDR<0.05, edgeR glm test).
- d. Heatmap showing MLL-N ChIP-seq enrichment for a 6kb region centered on the promoter (transcriptional start site (TSS)) of all genes in *CRISPR**MLL-AF4*<sup>+</sup> ALL, the SEM cell line and a primary *MLL-AF4* childhood-ALL (chALL) patient sample, sorted by MLL-N ChIP-seq signal in *CRISPR**MLL-AF4*<sup>+</sup> ALL. Scale = reads/bp/10<sup>7</sup> total reads.

| <b>Supplementary Table 1: Analysis of off-target editing</b> |                     |              |                                                                           |                                                                   |                                                                   |
|--------------------------------------------------------------|---------------------|--------------|---------------------------------------------------------------------------|-------------------------------------------------------------------|-------------------------------------------------------------------|
|                                                              |                     |              | <b>% of Sanger sequencing reads matching wild-type, unedited sequence</b> |                                                                   |                                                                   |
| <b>gene name</b>                                             | <b>PAM location</b> | <b>sgRNA</b> | <b>primary<br/><i>CRISPR</i> <i>MLL-AF4+</i><br/>ALL 1 (preB)</b>         | <b>primary<br/><i>CRISPR</i> <i>MLL-AF4+</i><br/>ALL 2 (proB)</b> | <b>primary<br/><i>CRISPR</i> <i>MLL-AF4+</i><br/>ALL 3 (proB)</b> |
| SMR3A                                                        | intron              | MLL          | 100%                                                                      | 100%                                                              | 100%                                                              |
| CTNDA                                                        | intron              | MLL          | 100%                                                                      | 100%                                                              | 100%                                                              |
| PARVA                                                        | intron              | MLL          | 100%                                                                      | 100%                                                              | 100%                                                              |
| KDM6B                                                        | intron              | MLL          | 100%                                                                      | 100%                                                              | 100%                                                              |
| DCC                                                          | intron              | MLL          | 100%                                                                      | 100%                                                              | 100%                                                              |
| TRGC2                                                        | intron              | MLL          | 100%                                                                      | 100%                                                              | 100%                                                              |
| ATRNL1                                                       | intron              | MLL          | 100%                                                                      | 100%                                                              | 100%                                                              |
| FOXO1                                                        | intron              | AF4          | 100%                                                                      | 100%                                                              | 100%                                                              |
| KCNQ2                                                        | exon                | AF4          | 100%                                                                      | 100%                                                              | 100%                                                              |
| MLL wild-type allele                                         | intron              | MLL          | 0% (100% with 1bp deletion)                                               | 0% (100% with 3bp deletion)                                       | 1% (99% with 16bp deletion)                                       |

| Supplementary Table 2: Summary of <i>in vivo</i> experiments |         |                                                                                |           |                               |          |                               |
|--------------------------------------------------------------|---------|--------------------------------------------------------------------------------|-----------|-------------------------------|----------|-------------------------------|
|                                                              | Primary |                                                                                | Secondary |                               | Tertiary |                               |
|                                                              | Control | <i>CRISPR</i> <i>MLL-AF4+</i>                                                  | Control   | <i>CRISPR</i> <i>MLL-AF4+</i> | Control  | <i>CRISPR</i> <i>MLL-AF4+</i> |
| Engrafted                                                    | 5/5     | 3/3                                                                            | 1/1       | 4/4                           | 2/2      | 3/3                           |
| ALL                                                          | 0/5     | 3/3                                                                            | 0/1       | 4/4                           | 0/2      | 3/3                           |
| Median latency                                               | n/a     | 18 weeks                                                                       | n/a       | 11.5 weeks                    | n/a      | 8 weeks                       |
| BM engraftment                                               | 5/5     | 3/3                                                                            | 1/1       | 4/4                           | 2/2      | 3/3                           |
| Splenomegaly                                                 | 0/5     | 3/3                                                                            | 0/1       | 4/4                           | 0/2      | 3/3                           |
| CNS infiltration (/of those tested)                          | 0/1     | 1/1                                                                            | 0/1       | 3/3                           | ND       | ND                            |
| Pred resistant <i>in vitro</i> (LC50 > 100µg/ml)             | n/a     | 1/1                                                                            | n/a       | 2/2                           | ND       | ND                            |
| L-asp resistant <i>in vitro</i> (LC50 > 0.1 IU/ml)           | n/a     | 1/1                                                                            | n/a       | 3/3                           | ND       | ND                            |
| proB (CD19+CD10-CD20-IgM/IgD-)                               | n/a     | 2/3                                                                            | n/a       | 2/4                           | n/a      | 3/3                           |
| preB (CD19+CD10+CD20-IgM/IgD-)                               | n/a     | 1/3                                                                            | n/a       | 2/4                           | n/a      | 0/3                           |
| CD34 positive (>20% of blasts)                               | n/a     | ProB (1/2);<br>PreB (0/1)                                                      | n/a       | ProB (1/2);<br>PreB (2/2)     | n/a      | ND                            |
| Karyotype                                                    | ND      | donor 1: 46 XY<br>t(4;11);<br>donor 2: 45 XY<br>t(4;11)<br>der(14;21)(q10;q10) | ND        | ND                            | ND       | ND                            |
| MLL-AF4/t(4;11) positive by FISH                             | n/a     | 80-97% (n=3, donor 1 and 2)                                                    | ND        | ND                            | ND       | ND                            |
| MLL-AF4 expression                                           | 0/2     | 2/2                                                                            | ND        | ND                            | ND       | ND                            |
| AF4-MLL expression                                           | 0/2     | 2/2                                                                            | ND        | ND                            | ND       | ND                            |
| VDJ rearrangement                                            | ND      | 2/3 (ProB and PreB) clonal;<br>1/3 (ProB) non-rearranged                       | ND        | ND                            | ND       | ND                            |



| <b>Supplementary Table 3: Oligonucleotides used</b> |                         |                         |
|-----------------------------------------------------|-------------------------|-------------------------|
| <b>sgRNAs</b>                                       |                         |                         |
| <b>Name</b>                                         | <b>Sequence</b>         |                         |
| MLL-sgRNA                                           | GGAGUGACAGACUGCACCAC    |                         |
| AF4-sgRNA                                           | UGAGAUGGAACUGGCGACAU    |                         |
| <b>Primers</b>                                      |                         |                         |
| <b>Name</b>                                         | <b>Forward sequence</b> | <b>Reverse sequence</b> |
| <i>CRISPR</i> MLL-AF4+ MLL-AF4 breakpoint (gDNA)    | AGGTGTGGTGGTGGGC        | GCCCTATCAGTTCCTGCCA     |
| <i>CRISPR</i> MLL-AF4+ AF4-MLL breakpoint (gDNA)    | GAGAGGCTGAGGTTGTAGGG    | GGCAACTGATTACACCCAATT   |
| <i>CRISPR</i> MLL-AF4+ MLL-AF4 (cDNA)               | GTGGAAGGCAACATCAGGC     | TATTGCTGTCAAAGGAGGCGG   |
| <i>CRISPR</i> MLL-AF4+ AF4-MLL (cDNA)               | CAGAAGCCCACGGCTTATGT    | AGGCACTCAGGGTGATAGC     |

| <b>Supplementary Table 4: Antibodies used</b> |                                       |                 |                  |
|-----------------------------------------------|---------------------------------------|-----------------|------------------|
| <b>Antibodies</b>                             | <b>Dilution</b>                       | <b>Company</b>  | <b>Catalog #</b> |
| <b>Flow Cytometry</b>                         |                                       |                 |                  |
| Viability eflour506                           | 1:100                                 | eBioscience     | 65-0866-18       |
| mouse CD45.1 APC-Cy7                          | 1:50                                  | Biolegend       | 103116           |
| CD45 AF700                                    | 1:100                                 | eBioscience     | 56-9459-42       |
| CD2 PerCP-Cy5.5                               | 1:50                                  | Biolegend       | 300216           |
| CD3 PerCP-Cy5.5                               | 1:50                                  | Biolegend       | 317336           |
| CD3 BV711                                     | 1:200                                 | Biolegend       | 317327           |
| CD14 PerCP-Cy5.5                              | 1:50                                  | Biolegend       | 301824           |
| CD16 PerCP-Cy5.5                              | 1:50                                  | Biolegend       | 302028           |
| CD56 PerCP-Cy5.5                              | 1:50                                  | Biolegend       | 318322           |
| CD56 BV605                                    | 1:50                                  | Biolegend       | 318334           |
| CD235a PerCP-Cy5.5                            | 1:100                                 | Biolegend       | 318322           |
| CD34 BV421                                    | 1:50                                  | Biolegend       | 343610           |
| CD34 PE-Cy7                                   | 1:50                                  | eBioscience     | 25-0349-42       |
| CD38 BV605                                    | 1:100                                 | Biolegend       | 303532           |
| CD19 APC                                      | 1:100                                 | Biolegend       | 302212           |
| CD10 FITC                                     | 1:20                                  | eBioscience     | 11-0106-42       |
| CD10 PE-Cy7                                   | 1:50                                  | eBioscience     | 25-0106-42       |
| CD20 eflou450                                 | 1:50                                  | eBioscience     | 48-0209-42       |
| IgM FITC                                      | 1:50                                  | Biolegend       | 314506           |
| IgD FITC                                      | 1:50                                  | biolegend       | 348205           |
| CD133 PE                                      | 1:100                                 | Miltenyi        | 130-080-801      |
| CD24 BV510                                    | 2.5-5:100 (batch titration-dependent) | Pharmagen       | 563035           |
| CD45 V450                                     | 2.5-5:100 (batch titration-dependent) | BD              | 642275           |
| CD34 PerCp                                    | 2.5-5:100 (batch titration-dependent) | BD              | 340909           |
| CD38 FITC                                     | 2.5-5:100 (batch titration-dependent) | BD              | 340909           |
| NG2 PE                                        | 2.5-5:100 (batch titration-dependent) | Beckman Coulter | B92429           |
| <b>ChIP</b>                                   |                                       |                 |                  |
| MLL-N                                         | 1:500                                 | Bethyl          | A300-086A        |
| AF4-C                                         | 1:500                                 | Abcam           | ab31812          |
| H3K79me2                                      | 1:500                                 | Millipore       | 04-835           |

| <b>Supplementary Table 5: Commercial products used</b> |                             |                  |
|--------------------------------------------------------|-----------------------------|------------------|
| <b>Product</b>                                         | <b>Company</b>              | <b>Catalog #</b> |
| MLL-AF4 FISH probes                                    | Cytocell                    | LPH 081          |
| MLL-ENL FISH probes                                    | Cytocell                    | RU-LPH 082       |
| MLL-AF9 FISH probes                                    | Cytocell                    | RU-LPH 083       |
| MLL-AF6 FISH probes                                    | Cytocell                    | RU-LPH 084       |
| MLL-AF10 FISH probes                                   | Cytocell                    | MPH 4850         |
| RNeasy mini kit                                        | QIAGEN                      | 74104            |
| DNeasy Blood and Tissue kit                            | QIAGEN                      | 69506            |
| SuperScript III reverse transcriptase kit              | Invitrogen                  | 18080051         |
| AMPure XP                                              | Beckman Coulter             | A63880           |
| NEBNext Ultra™ II DNA Library Prep Kit                 | New England Biolabs         | E7645            |
| NEBNext Ultra™ Directional RNA Library Prep Kit        | New England Biolabs         | E7420            |
| Cell Proliferation Kit I                               | Roche                       | 11465007001      |
| Alt-R® S.p. Cas9 Nuclease V3, 100 µg                   | Integrated DNA Technologies | 1081058          |
| Neon™ Transfection System                              | Invitrogen                  | MPK5000          |
| Neon™ Transfection System Pipette                      | Invitrogen                  | MPP100           |
| Neon™ Transfection System 10 µL Kit                    | Invitrogen                  | MPK1025          |
| StemLine II                                            | Sigma                       | S0192            |
| a-MEM                                                  | Gibco                       | 41061-029        |
| Fetal Bovine Serum (FBS)                               | Sigma                       | F7524            |
| SCF                                                    | Peprtech                    | HHSC3            |
| FLT3L                                                  | Peprtech                    | HHSC3            |
| IL2                                                    | Peprtech                    | 200-02           |
| IL7                                                    | Peprtech                    | 200-07           |
| TPO                                                    | Peprtech                    | HHSC3            |
| HEPES                                                  | Gibco                       | 15630-056        |
| 2-Mercaptoethanol                                      | Sigma                       | M3148            |
| Penicillin/Streptomycin                                | Sigma                       | P4333-100ML      |
| L-glutamine                                            | Gibco                       | 25030-024        |
| Trypsin                                                | Gibco                       | 10779413         |
| EDTA                                                   | Gibco                       | 15575020         |
